# Supplementary material for: Large-Scale Rice Mapping Using Multi-Task Spatiotemporal Deep Learning and Sentinel-1 SAR Time Series
Source: MDPI journal article supplement (doi:10.3390/rs14030699), 2022-02-02
Supplement: s1 [file s1]

Archive with 1 entries (1 files):
- remotesensing-1526204-supplementary.pdf
